# Supplementary material
Source: Springer Nature journal article supplement (https://www.springermedizin.de/resource/supplementary/13012_2013_703_MOESM3_ESM.pdf/9630262)

A: Preventive care - steady improvement

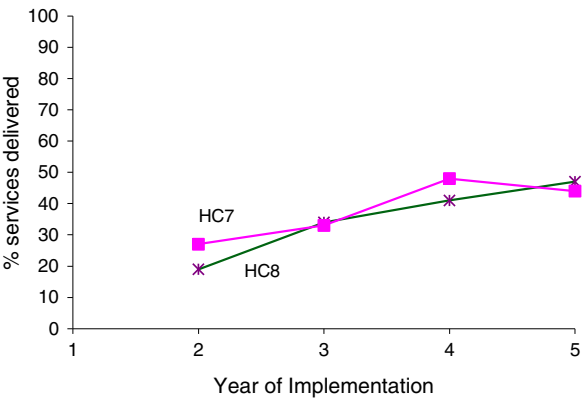

B: Diabetes care - steady improvement

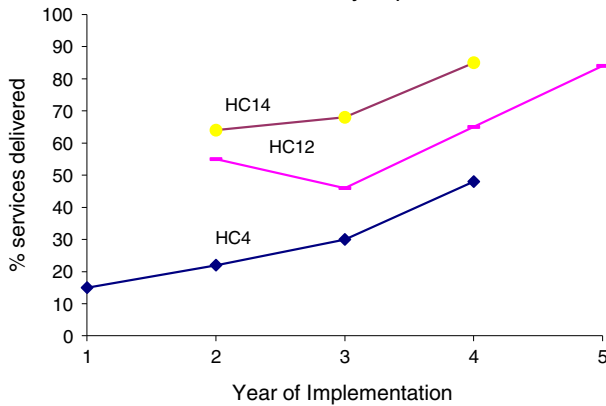

C: Diabetes care - sustained high or persistent low performance

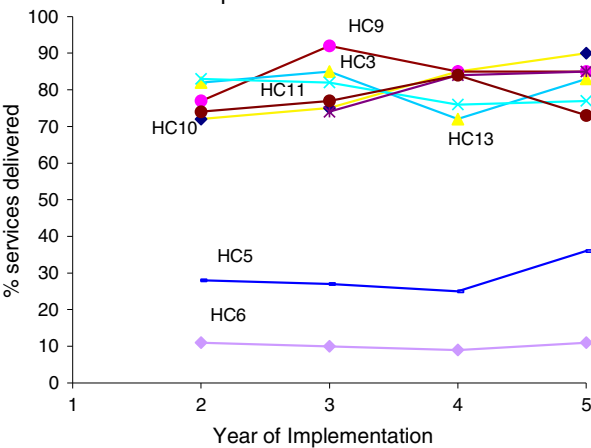

D: Preventive care - decline or persistent low performance

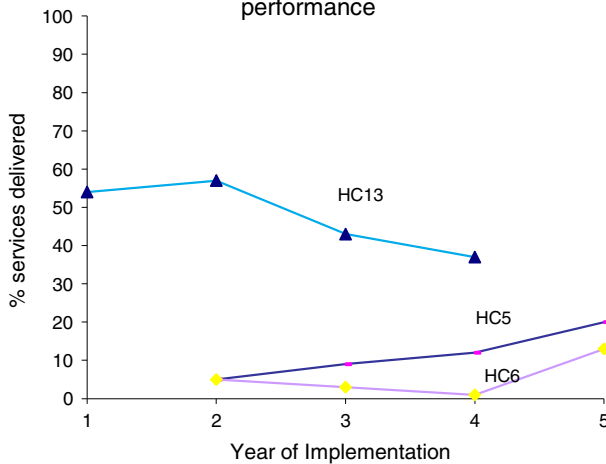

E: Diabetes care - marked change

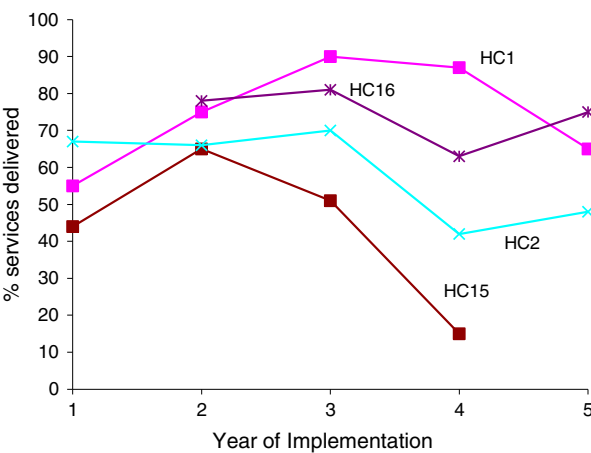

F: Preventive care - marked change

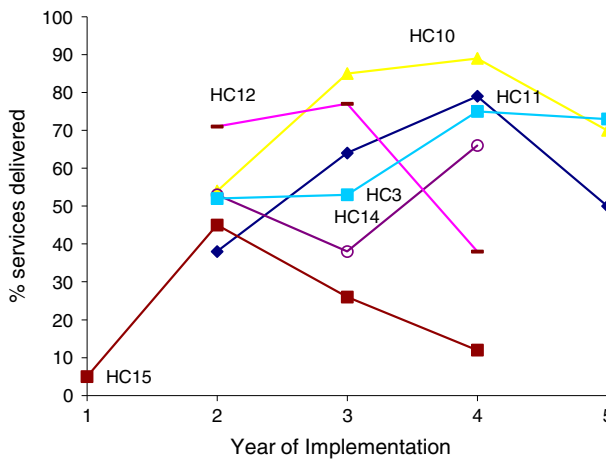

Supplement: MOESM3 [file 9630262]
